# Supplementary material
Source: PubMed Central journal article supplement (PMC5794010)
Supplement: NIHMS936368-supplement-3.pdf [file NIHMS936368-supplement-3.pdf]

## Supplementary information S3: Post-translational modifications of HSFs

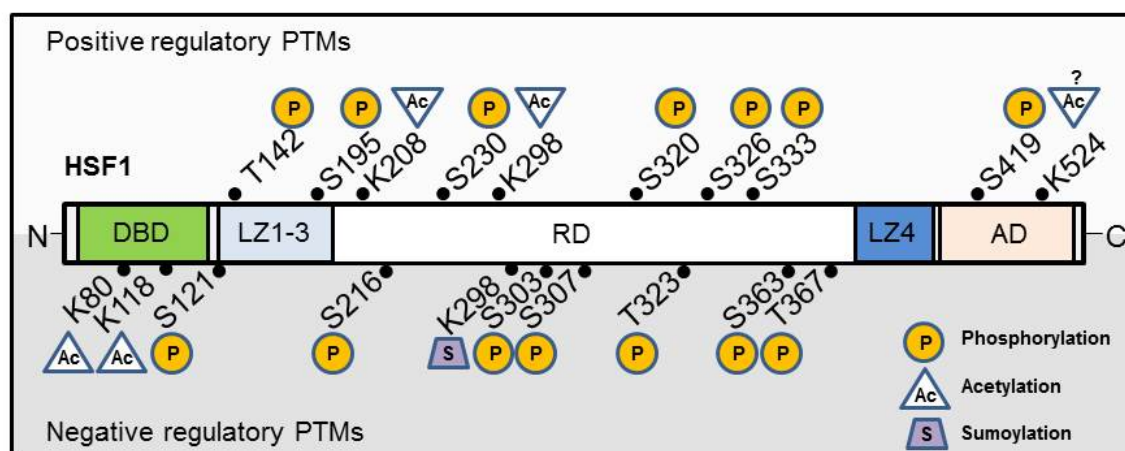

Both HSF1 and HSF2 undergo a number of Post-translational modifications (PTM). Those that influence the function or stability of HSF1 have been most thoroughly investigated. Here we will summarize these PTMs in terms of their type, location and whether they have been experimentally determined to have a positive or negative impact on HSF1 activity (see Figure).

### Phosphorylation

HSF1, but not HSF2 activity and stability is regulated, in part, by Ser (S)/Thr (T) phosphorylation<sup>1,2</sup> (see Figure and Table 1). Because of the changes observed in the phosphorylation state of HSF1 in response to proteotoxic conditions, this PTM has been widely studied<sup>1,3</sup>. At 37°C, basal phosphorylation at S121, S303, S307 and S363 repress HSF1 transcriptional activity<sup>4,5</sup>. More recent studies have connected some of these

phosphorylation events to changes in HSF1 activity and stability in disease. For example phosphorylation of S121, mediated by AMPK, has an important role in HSF1 repression during metabolic stress<sup>6</sup>.

Two recent reports link HSF1 phosphorylation at S303 and S307 to its opposing activity and stability in cancer and in Huntington's disease. HSF1 phosphorylated at S303 and/or 307 shows increased interaction with the E3 ligase F box protein FBXW7, which targets HSF1 for ubiquitin-dependent proteasomal degradation<sup>7,8</sup>. In Huntington's disease these phosphorylations are mediated by casein kinase II alpha prime (CK2 $\alpha'$ ) (**Figure 4b, 5b**). Both CK2 $\alpha'$  and FBXW7 are present at high levels in Huntington's disease, whereas decreased levels of FBXW7 in melanoma cells results in increased HSF1 abundance (**Figure 5b**)<sup>7</sup>. HSF1 is also activated in cancer cells by its association with IER5 (Immediate Early Response gene 5), which forms a complex with protein phosphatase PP2A, which leads to decreased phosphorylation of S121, S307, S314, T323 and T367, thereby generating a hypo-phosphorylated, active form of HSF1<sup>9</sup>.

Among the positive regulatory phosphorylation events on HSF1, S230, S320, and S326 are strongly associated with HSF1 activation under stress conditions and hyper-phosphorylation of these residues is commonly used as a surrogate for HSF1 activation<sup>10-13,14</sup>. Increased phosphorylation of S326 mediated by MEK1 and other kinases is associated with HSF1 activation in cancer cells and tissues<sup>15,16</sup>. However, an important study using an HSF1 mutant (HSF1 $\Delta$ PRD), in which 15 known phosphorylation sites within the Regulatory Domain (RD) were mutated to preclude phosphorylation, have revealed no alteration in the subcellular localization, DNA-binding or trans-activation

potential of HSF1 in cell culture <sup>17</sup>. This suggests that the HSF1 hyper-phosphorylation signature alone is not an absolute marker for assessing HSF1 activity under all conditions, and further studies will be required to understand the role of these phosphorylation events.

### *SUMOylation*

SUMOylation is an emerging protein modification with diverse roles in biology. HSF1 is SUMOylated at Lys298 (K298) by Ubc9 (see Figure and Table 1) in a mechanism that is dependent on prior phosphorylation at nearby S303 (this is referred to as phosphorylation dependent SUMOylation motif or PDSM) <sup>10,18,19</sup>. The negative regulatory role for HSF1 SUMOylation is supported by the observation that HSF1 de-SUMOylation occurs progressively with increasing temperatures, and that a HSF1 mutant (where K298 is exchanged to arginine), which cannot be SUMOylated, hyper-activates HSF1 target gene expression <sup>20</sup>. Since K298 SUMOylation is not known to affect HSF1 stability or subcellular localization, this modification may modulate HSF1 activity, perhaps by influencing interactions with regulatory factors <sup>21</sup>. Similar to HSF1, the HSF4 $\beta$  isoform possesses a PDSM motif where K293 SUMOylation is promoted by S298 phosphorylation. This SUMOylation appears to repress HSF4 $\beta$  activity <sup>22</sup>.

HSF2 sumoylation increases during mitosis <sup>22</sup>. Although this does not affect HSF2 oligomerization, HSF2-K82 sumoylation within the wing domain (corresponding to K91 in

HSF1) inhibits HSF2 DNA binding activity<sup>1</sup>. Recently, the repressive role of HSF2-K82 sumoylation has been confirmed using an HSF1 DNA Binding Domain (DBD) chimera (HSF1W2) containing the HSF2 wing domain. While the HSF1 DBD is not SUMOylated, the HSF1W2 protein is SUMOylated *in vitro* and this chimeric protein has reduced HSF1 DBD-driven DNA binding and target activation *in vivo*<sup>23</sup>. The differential SUMOylation profile of HSF1 and HSF2 DBDs observed *in vivo*<sup>23</sup> may drive specific protein–protein interactions within the wing domain, and elsewhere, that impact target-gene binding and other regulatory steps *in vivo*. The SUMOylation sites for the HSF1 and HSF2 isoforms have been validated by proteome-wide analyses, which revealed additional SUMOylation sites with unknown biological consequences<sup>24</sup>.

### *Ubiquitylation*

Although HSF1 is subject to ubiquitylation (Ub)-dependent degradation under different physiological or pathophysiological conditions<sup>25,26,27</sup> no specific ubiquitylated residues have been identified to date that drive this degradation. HSF2 is also highly ubiquitylated during hyperthermia<sup>28</sup>. Treatment of cells with MG132 or the cancer chemotherapeutic bortezomib, both of which inhibit the proteasome, stabilize HSF2<sup>29</sup>. A high-throughput ubiquitin-modified proteomics analysis revealed that HSF2-Ub occurs on K51, K151, K210 and K420<sup>30,31</sup>, though a role for these ubiquitylation events in HSF2 stability has not been reported.

### Acetylation

HSF1 is acetylated (Ac) at several lysine residues under both basal and stress conditions<sup>32,26</sup> (see Figure and Table 1). Acetylation of HSF1 at K80 results in the occlusion of direct phosphate backbone contacts that are critical for HSF1 DNA binding. This acetylation is mediated by the acetyltransferase p300 and is reversed by SIRT1<sup>1,32</sup>. HSF1 is also acetylated at additional sites including K118, K208 and K298, which is driven by p300/CBP- (see Figure)<sup>26</sup>. Similar to HSF1 K80, acetylation of K118 regulates HSF1 DNA binding, while K208 and K298 acetylations inhibit HSF1 proteasomal degradation<sup>26</sup>. Acetylation of K298 would preclude SUMOylation at the primary amine of this residue, suggesting that dynamic changes in acetylation and SUMOylation could function together in the regulation of HSF1 stability (see Figure). Although HSF1 acetylation has not been studied in neurodegenerative disease models, the activity of the histone acetyltransferase p300/CBP is reduced in Huntington's disease cell models, which could lead to decreased HSF1 acetylation and stability, potentially contributing to the reduction in HSF1 protein levels observed in Huntington's disease models and postmortem tissues from patients<sup>33,34,8</sup>.

Several other HSF1 PTMs have been described (<http://www.phosphosite.org/proteinAction?id=1196&showAllSites=true>) although their importance in modulating HSF1 activity or abundance is currently unknown.

## References

- 1 Anckar, J. & Sistonen, L. Regulation of HSF1 function in the heat stress response: implications in aging and disease. *Annu.Rev.Biochem.* **80**, 1089-1115 (2011).
- 2 Xu, Y. M., Huang, D. Y., Chiu, J. F. & Lau, A. T. Post-translational modification of human heat shock factors and their functions: a recent update by proteomic approach. *J Proteome Res* **11**, 2625-2634, doi:10.1021/pr201151a (2012).
- 3 Akerfelt, M., Morimoto, R. I. & Sistonen, L. Heat shock factors: integrators of cell stress, development and lifespan. *Nat.Rev.Mol.Cell Biol.* **11**, 545-555 (2010).
- 4 Zou, J., Guo, Y., Guettouche, T., Smith, D. F. & Voellmy, R. Repression of heat shock transcription factor HSF1 activation by HSP90 (HSP90 complex) that forms a stress-sensitive complex with HSF1. *Cell* **94**, 471-480 (1998).
- 5 Kline, M. P. & Morimoto, R. I. Repression of the heat shock factor 1 transcriptional activation domain is modulated by constitutive phosphorylation. *Mol.Cell Biol.* **17**, 2107-2115 (1997).
- 6 Dai, S. *et al.* Suppression of the HSF1-mediated proteotoxic stress response by the metabolic stress sensor AMPK. *EMBO J* **34**, 275-293, doi:10.15252/embj.201489062 (2015).
- 7 Kourtis, N. *et al.* FBXW7 modulates cellular stress response and metastatic potential through HSF1 post-translational modification. *Nat.Cell Biol.* **17**, 322-332 (2015).
- 8 Gomez-Pastor, R. *et al.* Abnormal degradation of the neuronal stress-protective transcription factor HSF1 in Huntington's disease. *Nat Commun* **8**, 14405, doi:10.1038/ncomms14405 (2017).
- 9 Asano, Y. *et al.* IER5 generates a novel hypo-phosphorylated active form of HSF1 and contributes to tumorigenesis. *Sci Rep* **6**, 19174, doi:10.1038/srep19174 (2016).
- 10 Hietakangas, V. *et al.* Phosphorylation of serine 303 is a prerequisite for the stress-inducible SUMO modification of heat shock factor 1. *Mol.Cell Biol.* **23**, 2953-2968 (2003).
- 11 Guettouche, T., Boellmann, F., Lane, W. S. & Voellmy, R. Analysis of phosphorylation of human heat shock factor 1 in cells experiencing a stress. *BMC.Biochem.* **6**, 4 (2005).
- 12 Murshid, A. *et al.* Protein kinase A binds and activates heat shock factor 1. *PLoS One* **5**, e13830, doi:10.1371/journal.pone.0013830 (2010).
- 13 Chou, S. D., Prince, T., Gong, J. & Calderwood, S. K. mTOR is essential for the proteotoxic stress response, HSF1 activation and heat shock protein synthesis. *PLoS One* **7**, e39679, doi:10.1371/journal.pone.0039679 (2012).
- 14 Tang, Z. *et al.* MEK guards proteome stability and inhibits tumor-suppressive amyloidogenesis via HSF1. *Cell* **160**, 729-744, doi:10.1016/j.cell.2015.01.028 (2015).
- 15 Dai, C. *et al.* Loss of tumor suppressor NF1 activates HSF1 to promote carcinogenesis. *J.Clin.Invest* **122**, 3742-3754 (2012).

- 16 Chou, S. D., Murshid, A., Eguchi, T., Gong, J. & Calderwood, S. K. HSF1 regulation of  $\beta$ -catenin in mammary cancer cells through control of HuR/elavL1 expression. *Oncogene* **34**, 2178-2188, doi:10.1038/onc.2014.177 (2015).
- 17 Budzyński, M. A., Puustinen, M. C., Joutsen, J. & Sistonen, L. Uncoupling Stress-Inducible Phosphorylation of Heat Shock Factor 1 from Its Activation. *Mol Cell Biol* **35**, 2530-2540, doi:10.1128/MCB.00816-14 (2015).
- 18 Anckar, J. *et al.* Inhibition of DNA binding by differential sumoylation of heat shock factors. *Mol. Cell Biol.* **26**, 955-964 (2006).
- 19 Hietakangas, V. *et al.* PDPM, a motif for phosphorylation-dependent SUMO modification. *Proc.Natl.Acad.Sci.U.S.A* **103**, 45-50 (2006).
- 20 Newton, E. M., Knauf, U., Green, M. & Kingston, R. E. The regulatory domain of human heat shock factor 1 is sufficient to sense heat stress. *Mol Cell Biol* **16**, 839-846 (1996).
- 21 Anckar, J. & Sistonen, L. Regulation of HSF1 function in the heat stress response: implications in aging and disease. *Annu Rev Biochem* **80**, 1089-1115, doi:10.1146/annurev-biochem-060809-095203 (2011).
- 22 Xing, H. *et al.* Mechanism of hsp70i gene bookmarking. *Science* **307**, 421-423, doi:10.1126/science.1106478 (2005).
- 23 Jaeger, A. M., Pemble, C. W., Sistonen, L. & Thiele, D. J. Structures of HSF2 reveal mechanisms for differential regulation of human heat-shock factors. *Nat Struct Mol Biol* **23**, 147-154, doi:10.1038/nsmb.3150 (2016).
- 24 Hendriks, I. A. *et al.* Site-specific mapping of the human SUMO proteome reveals co-modification with phosphorylation. *Nat Struct Mol Biol* **24**, 325-336, doi:10.1038/nsmb.3366 (2017).
- 25 Hu, Y. & Mivechi, N. F. Promotion of heat shock factor Hsf1 degradation via adaptor protein filamin A-interacting protein 1-like (FILIP-1L). *J.Biol.Chem.* **286**, 31397-31408 (2011).
- 26 Raychaudhuri, S. *et al.* Interplay of Acetyltransferase EP300 and the Proteasome System in Regulating Heat Shock Transcription Factor 1. *Cell* **156**, 975-985 (2014).
- 27 Lee, Y. J. *et al.* HSF1 as a mitotic regulator: phosphorylation of HSF1 by Plk1 is essential for mitotic progression. *Cancer Res.* **68**, 7550-7560 (2008).
- 28 Mathew, A., Mathur, S. K. & Morimoto, R. I. Heat shock response and protein degradation: regulation of HSF2 by the ubiquitin-proteasome pathway. *Mol Cell Biol* **18**, 5091-5098 (1998).
- 29 Elsing, A. N. *et al.* Expression of HSF2 decreases in mitosis to enable stress-inducible transcription and cell survival. *J Cell Biol* **206**, 735-749, doi:10.1083/jcb.201402002 (2014).
- 30 Kim, W. *et al.* Systematic and quantitative assessment of the ubiquitin-modified proteome. *Mol Cell* **44**, 325-340, doi:10.1016/j.molcel.2011.08.025 (2011).
- 31 Wagner, S. A. *et al.* A proteome-wide, quantitative survey of in vivo ubiquitylation sites reveals widespread regulatory roles. *Mol Cell Proteomics* **10**, M111.013284, doi:10.1074/mcp.M111.013284 (2011).
- 32 Westerheide, S. D., Anckar, J., Stevens, S. M., Jr., Sistonen, L. & Morimoto, R. I. Stress-inducible regulation of heat shock factor 1 by the deacetylase SIRT1. *Science* **323**, 1063-1066 (2009).
- 33 Chafekar, S. M. & Duennwald, M. L. Impaired heat shock response in cells expressing full-length polyglutamine-expanded huntingtin. *PLoS.One.* **7**, e37929 (2012).
- 34 Maheshwari, M. *et al.* Dexamethasone induces heat shock response and slows down disease progression in mouse and fly models of Huntington's disease. *Hum.Mol.Genet.* (2013).
