# Supplementary material
Source: PubMed Central journal article supplement (PMC5794010)
Supplement: NIHMS936368-supplement-4.pdf [file NIHMS936368-supplement-4.pdf]

### Supplementary information S4: HSFs and brain function

HSFs play essential roles in brain function and development through the modulation of neuronal migration, the formation and maintenance of neuronal synapses and providing resistance to proteotoxic stress. HSF1 is needed to maintain a normal neuronal differentiation program, brain structure, and to establish and maintain synaptic fidelity for memory consolidation<sup>1,2</sup>. In the hippocampus the absence of HSF1 causes a decrease in the dendrite length of the dentate gyrus granule neurons and decreased dendritic spine density, resulting in reduced synapse formation. *Hsf1*<sup>-/-</sup> mice also show reduced dendrite length in pyramidal neurons of the *cornu ammonis* supporting the essential role of HSF1 in maintaining the structural integrity of hippocampal neurons<sup>3</sup>. In addition, the absence of HSF1 reduced neuronal progenitor proliferation, enhanced premature neuronal differentiation and caused increased anxiety and depression<sup>3-5</sup>.

The loss of HSF1 also results in ataxia and other motor deficits, attributed to hippocampus, basal ganglia, cerebellar and hindlimb dysfunction as a consequence of astrogliosis and demyelination<sup>6</sup>. More recently, the motor deficits associated with an early stage of cerebellar ataxia have been linked to a role for HSF1 in regulating Ca<sup>2+</sup> homeostasis through its activation of calbindin expression in cerebellar Purkinje cells<sup>7</sup>. HSF1 also plays a fundamental role in lipid raft formation<sup>1,3,8</sup>, which ensures proper post-synaptic consolidation that ultimately leads to the activation of memory receptors and long-term memory retention. HSF1 also activates expression of brain-derived neurotrophic factor (BDNF)<sup>1</sup>, which contributes to the survival of peripheral and CNS

neurons and is an important regulator of synaptogenesis and synaptic plasticity mechanisms underlying learning and memory <sup>9</sup>.

HSFs have important protective roles in response to stresses during brain development, prenatal exposure to stressful conditions and in neuropsychiatric disorders <sup>10</sup>. Although HSF1 activation is very robust in the embryonic brain, it is compromised in mature neurons in the adult brain <sup>11</sup>. Prenatal exposure to stressful conditions such as alcohol, methylmercury or maternal epileptic seizure induces HSF1 nuclear localization and binding to the HSP70 promoter in cortical cells, activating HSP70 expression <sup>10</sup>. Prenatal exposure to alcohol activates HSF1 in a manner that differs from that classically described for proteotoxic stress. While HSF1 hyper-phosphorylation is not detected in ethanol exposed embryos, reduced acetylation and SUMOylation are observed (see also Supplementary information S3 (box) for details on post-translational modifications of HSF1) <sup>12</sup>. When *Hsf1*<sup>-/-</sup> mice are exposed to similar prenatal stressful conditions, structural abnormalities appear in the cerebral cortex, associated with increased incidence of leptomeningeal heterotopia in the frontal cortex. These alterations increase susceptibility to epilepsy and correlate with some features of schizophrenia <sup>10</sup>.

Maternal alcohol consumption during pregnancy leads to Fetal Alcohol Syndrome (FAS) in a mechanism that is, in part, controlled by HSF2 <sup>12</sup>. Both HSF1 and HSF2 are activated in the brain cortex by chronic prenatal alcohol exposure, forming ethanol-induced HSF1-HSF2 heterotrimers that activate microtubule regulators controlling radial neuronal migration and neuronal positioning <sup>10,12, 13</sup>. *Hsf2*<sup>-/-</sup> mice exposed to prenatal alcohol

consumption revealed decreased neural abnormalities in the cortex and showed decreased HSF1 binding to its target genes, demonstrating the role of HSF2 in mediating defects that are characteristic of FAS<sup>12</sup>.

## References

- 1 Chen, Y. *et al.* Hsp90 chaperone inhibitor 17-AAG attenuates Abeta-induced synaptic toxicity and memory impairment. *J. Neurosci.* **34**, 2464-2470 (2014).
- 2 Hooper, P. L., Durham, H. D., Török, Z., Crul, T. & Vigh, L. The central role of heat shock factor 1 in synaptic fidelity and memory consolidation. *Cell Stress Chaperones* **21**, 745-753, doi:10.1007/s12192-016-0709-1 (2016).
- 3 Uchida, S. *et al.* Impaired hippocampal spinogenesis and neurogenesis and altered affective behavior in mice lacking heat shock factor 1. *Proc Natl Acad Sci U S A* **108**, 1681-1686, doi:10.1073/pnas.1016424108 (2011).
- 4 Yang, J., Oza, J., Bridges, K., Chen, K. Y. & Liu, A. Y. Neural differentiation and the attenuated heat shock response. *Brain Res* **1203**, 39-50, doi:10.1016/j.brainres.2008.01.082 (2008).
- 5 Liu, D. J. *et al.* SIRT1 Knockdown Promotes Neural Differentiation and Attenuates the Heat Shock Response. *J. Cell Physiol* (2014).
- 6 Homma, S. *et al.* Demyelination, astrogliosis, and accumulation of ubiquitinated proteins, hallmarks of CNS disease in hsf1-deficient mice. *J Neurosci* **27**, 7974-7986, doi:10.1523/JNEUROSCI.0006-07.2007 (2007).
- 7 Ingenwerth, M., Estrada, V., Stahr, A., Müller, H. W. & von Gall, C. HSF1-deficiency affects gait coordination and cerebellar calbindin levels. *Behav Brain Res* **310**, 103-108, doi:10.1016/j.bbr.2016.05.015 (2016).
- 8 Nagy, E. *et al.* Hyperfluidization-coupled membrane microdomain reorganization is linked to activation of the heat shock response in a murine melanoma cell line. *Proc Natl Acad Sci U S A* **104**, 7945-7950, doi:10.1073/pnas.0702557104 (2007).
- 9 Cunha, C., Brambilla, R. & Thomas, K. L. A simple role for BDNF in learning and memory? *Front Mol Neurosci* **3**, 1, doi:10.3389/neuro.02.001.2010 (2010).
- 10 Hashimoto-Torii, K. *et al.* Roles of heat shock factor 1 in neuronal response to fetal environmental risks and its relevance to brain disorders. *Neuron* **82**, 560-572, doi:10.1016/j.neuron.2014.03.002 (2014).
- 11 Morimoto, R. I. Proteotoxic stress and inducible chaperone networks in neurodegenerative disease and aging. *Genes Dev* **22**, 1427-1438, doi:10.1101/gad.1657108 (2008).
- 12 El Fatimy, R. *et al.* Heat shock factor 2 is a stress-responsive mediator of neuronal migration defects in models of fetal alcohol syndrome. *EMBO Mol Med* **6**, 1043-1061, doi:10.15252/emmm.201303311 (2014).
- 13 Jaeger, A. M., Pemble, C. W., Sistonen, L. & Thiele, D. J. Structures of HSF2 reveal mechanisms for differential regulation of human heat-shock factors. *Nat Struct Mol Biol* **23**, 147-154, doi:10.1038/nsmb.3150 (2016).
