# Supplementary material
Source: PubMed Central journal article supplement (PMC5794010)
Supplement: NIHMS936368-supplement-6.pdf [file NIHMS936368-supplement-6.pdf]

**Supplementary Information S6: List of genes differentially regulated by HSF1 in Cancer and in Huntington disease (see Fig. 5b)****Cancer***Chaperones*

HSPA1A (Heat Shock Protein Family A (Hsp70) Member 1a)  
HSP90AB1 (Heat Shock Protein 90 Alpha Family Class B Member 1)  
HSP90AA1 (Heat Shock Protein 90 Alpha Family Class A Member 1)  
SERPINH1 (Serpins Family H Member 1)  
CCT3 (Chaperonin Containing TCP1 subunit 3)

*Apoptosis*

BAX (BCL2 Associated X, Apoptosis Regulator)  
MAPT (Microtubule Associated Protein Tau)  
CFLAR (Caspase-Like Apoptosis Regulatory Protein)

*Cell Metabolism*

PGK1 (Phosphoglycerate Kinase 1)  
SLC5A3 (Solute Carrier Family 5 Member 3)  
FASN (Fatty Acid Synthase)

*Cell cycle progression*

CDC6 (Cell Division Cycle 6)  
CKS1B (CDC28 Protein Kinase Regulatory Subunit 1B)  
POLA2 (DNA Polymerase Alpha 2, Accessory Subunit)

*mRNA processing and translation*

RBM23 (RNA Binding Motif Protein 23)  
EIF4A2 (Eukaryotic Translation Initiation Factor 4A2)  
RPL22 (Ribosomal Protein L22)  
LRIF1 (Ligand Dependent Nuclear Receptor Interacting Factor 1)

*DNA repair, chromatin remodeling*

MLH1 (MutL Homolog 1)  
RAD51L1 (RAD51 Paralog B)  
CBX3 (Heterochromatin Protein 1 Homolog Gamma)  
MUM1 (Melanoma Associated Antigen (Mutated) 1)

**Neurodegenerative diseases**

Huntington Disease

*Chaperones and autophagy*

HSPB6 (Heat shock protein beta-6)

HSPB1 (Heat shock protein beta-1)

ATG16L2 (Autophagy Related 16-2)

ATG3 (Ubiquitin-like-conjugating enzyme ATG3)

*Cell proliferation*

FLT4 (Vascular endothelial growth factor receptor 3)

IGF1 (Insulin Like Growth Factor 1)

MEP1A (Meprin A Subunit Alpha)

CD276 (CD276 antigen)

*Cell metabolism*PGC1 $\alpha$  (Peroxisome proliferator-activated receptor gamma coactivator 1-alpha)*Endocytosis and vesicle trafficking*

STON2 (Stonin-2)

LRP1 Low-density lipoprotein receptor-related protein 1)

*GTPase signaling*

RAB11A (Ras-related protein Rab-11A)

RAB11FIP3 (Rab11 family-interacting protein 3)

RAB6B (Ras-related protein Rab-6B)

RIN1 (Ras and Rab interactor 1)

KALRN (Kalirin)
